# Supplementary material for: Human Embryonic Stem Cells Express Elevated Levels of Multiple Pro-Apoptotic BCL-2 Family Members
Source: PLoS One. 2011 Dec 9;6(12):e28530. doi: 10.1371/journal.pone.0028530 (PMC3235131; doi:10.1371/journal.pone.0028530)
Supplement: Table S1 — qPCR primer and UPL probe sequences used in this study. (XLS) [file pone.0028530.s002.xls]

## Sheet: BCL2 UPL ASSAYS
	HUGO	ALIAS	TRANSCRIPT	TRANSCRIPT NAME	FORWARD PRIMER	UPL PROBE	REVERSE PRIMER	FORWARD PRIMER SEQUENCE	UPL PROBE SEQUENCE	REVERSE PRIMER SEQUENCE	ASSAY SPECIFICITY	Intron Spanning?	LABEL ON CHIP IF NOT HUGO	CHIP	ASSAY
	ACTB	ACTB	NM_001101.3	.	DMP-289	64	DMP-290	CCAACCGCGAGAAGATGA	CAGCCTGG	CCAGAGGCGTACAGGGATAG	.	yes	.	1
	AFP	AFP	NM_001134.1	.	DMP-281	61	DMP-282	TGTACTGCAGAGATAAGTTTAGCTGAC	CTGGGCAA	TCCTTGTAAGTGGCTTCTTGAAC	.	yes	.	5	FAIL
	ATP5J	ATP5J	NM_001003703.1	variant 1 (isoform a)	DMP-293	82	DMP-294	TCCGAGACGCTTCCTGTC	CAGAGGAG	AATGGACTGAGACGGCTGAC	variant, amplicon (bp) (bp): 2, 88; 5, 138; 1 224	yes	.	1
	ATP5J	ATP5J	NM_001685.4	variant 2 (isoform a)	DMP-293	82	DMP-294	TCCGAGACGCTTCCTGTC	CAGAGGAG	AATGGACTGAGACGGCTGAC	variant, amplicon (bp) (bp): 2, 88; 5, 138; 1 224	yes	.	1
	ATP5J	ATP5J	NM_001003701.1	variant 5 (variant b)	DMP-293	82	DMP-294	TCCGAGACGCTTCCTGTC	CAGAGGAG	AATGGACTGAGACGGCTGAC	variant, amplicon (bp): 2, 88; 5, 138; 1 224	yes	.	1
	B2M	B2M	NM_004048.2	.	DMP-295	42	DMP-296	TTCTGGCCTGGAGGCTATC	CATCCAGC	TCAGGAAATTTGACTTTCCATTC	.	yes	.	1
	BAD	BAD	NM_004322.3	variant 1 (longer transcript, same isoform)	DMP-209	45	DMP-210	ACCAGCAGCAGCCATCAT	CTGGGGCT	GGTAGGAGCTGTGGCGACT	variant, amplicon (bp): 1, 64; 2, 64	yes	.	2
	BAD	BAD	NM_032989.2	variant 2 (longer transcript, same isoform)	DMP-209	45	DMP-210	ACCAGCAGCAGCCATCAT	CTGGGGCT	GGTAGGAGCTGTGGCGACT	variant, amplicon (bp): 1, 64; 2, 64	yes	.	2
	BAK1	BAK	NM_001188.3	.	DMP-217	82	DMP-218	CCTGCCCTCTGCTTCTGA	CAGAGGAG	CTGCTGATGGCGGTAAAAA	.	yes	.	2
	BAX	BAX	NM_138761.3	variant alpha	DMP-255	57	DMP-256	ATGTTTTCTGACGGCAACTTC	CTGGGGCC	ATCAGTTCCGGCACCTTG	alpha, beta, delta, sigma amplicon (bp) 104, epsilon amplicon (bp) 202	yes	BAX-B	4
	BAX	BAX	NM_138761.3	variant alpha	DMP-257	55	DMP-258	CAAGACCAGGGTGGTTGG	TCCTCTCC	CACTCCCGCCACAAAGAT	epsilon, alpha, delta amplicon (bp) 84	yes	BAX-C	4
	BAX	BAX	NM_138761.3	variant alpha	DMP-259	69	DMP-260	CCATCATGGGCTGGACAT	CTTCCTCC	CACTCCCGCCACAAAGAT	epsilon, alpha, delta amplicon (bp) 138, sigma amplicon (bp) 98	yes	BAX-D	4
	BAX	BAX	NM_138761.3	variant alpha	DMP-261	30	DMP-262	CAAGACCAGGGTGGTTGG	GGCTGAGG	TGGAGGAAAAACACAGTCCA	epsilon, alpha, delta amplicon (bp) 158, sigma amplicon (bp) 119	yes	BAX-E	4
	BAX	BAX	NM_004324.3	variant beta	DMP-255	57	DMP-256	ATGTTTTCTGACGGCAACTTC	CTGGGGCC	ATCAGTTCCGGCACCTTG	alpha, beta, delta, sigma amplicon (bp) 104, epsilon amplicon (bp) 202	yes	BAX-B	4
	BAX	BAX	NM_138763.3	variant delta	DMP-255	57	DMP-256	ATGTTTTCTGACGGCAACTTC	CTGGGGCC	ATCAGTTCCGGCACCTTG	alpha, beta, delta, sigma amplicon (bp) 104, epsilon amplicon (bp) 202	yes	BAX-B	4
	BAX	BAX	NM_138763.3	variant delta	DMP-257	55	DMP-258	CAAGACCAGGGTGGTTGG	TCCTCTCC	CACTCCCGCCACAAAGAT	epsilon, alpha, delta amplicon (bp) 84	yes	BAX-C	4
	BAX	BAX	NM_138763.3	variant delta	DMP-259	69	DMP-260	CCATCATGGGCTGGACAT	CTTCCTCC	CACTCCCGCCACAAAGAT	epsilon, alpha, delta amplicon (bp) 138, sigma amplicon (bp) 98	yes	BAX-D	4
	BAX	BAX	NM_138763.3	variant delta	DMP-261	30	DMP-262	CAAGACCAGGGTGGTTGG	GGCTGAGG	TGGAGGAAAAACACAGTCCA	epsilon, alpha, delta amplicon (bp) 158, sigma amplicon (bp) 119	yes	BAX-E	4
	BAX	BAX	NR_027882.1	variant epsilon	DMP-253	13	DMP-254	AGCAAACTGGTGCTCAAGG	CTCTGCCT	GCTGAGGCAGGTGAATCG	epsilon only	yes	BAX-A	4
	BAX	BAX	NM_138764.4	variant sigma	DMP-255	57	DMP-256	ATGTTTTCTGACGGCAACTTC	CTGGGGCC	ATCAGTTCCGGCACCTTG	alpha, beta, delta, sigma amplicon (bp) 104, epsilon amplicon (bp) 202	yes	BAX-B	4
	BAX	BAX	NM_138764.4	variant sigma	DMP-259	69	DMP-260	CCATCATGGGCTGGACAT	CTTCCTCC	CACTCCCGCCACAAAGAT	epsilon, alpha, delta amplicon (bp) 138, sigma amplicon (bp) 98	yes	BAX-D	4
	BAX	BAX	NM_138764.4	variant sigma	DMP-261	30	DMP-262	CAAGACCAGGGTGGTTGG	GGCTGAGG	TGGAGGAAAAACACAGTCCA	epsilon, alpha, delta amplicon (bp) 158, sigma amplicon (bp) 119	yes	BAX-E	4
	BBC3	PUMA	NM_001127240.1	variant 1 (exons 1-4)	DMP-221	68	DMP-222	GACCTCAACGCACAGTACGA	AGGAGCAG	GAGATTGTACAGGACCCTCCA	variant 1, 2 and 4	yes	.	2
	BBC3	PUMA	NM_001127241.1	variant 2 (exons 1, 3, 4)	DMP-221	68	DMP-222	GACCTCAACGCACAGTACGA	AGGAGCAG	GAGATTGTACAGGACCCTCCA	variant 1, 2 and 4	yes	.	2
	BBC3	PUMA	NM_014417.3	variant 4 (exons 2, 3, 4)	DMP-221	68	DMP-222	GACCTCAACGCACAGTACGA	AGGAGCAG	GAGATTGTACAGGACCCTCCA	variant 1, 2 and 4	yes	.	2
	BCL2	BCL2	NM_000633.2	variant alpha	DMP-205	6	DMP-206	TTGACAGAGGATCATGCTGTACTT	CAGAGGAA	ATCTTTATTTCATGAGGCACGTT	isoform alpha and beta	yes	.	2
	BCL2	BCL2	NM_000633.2	variant alpha	DMP-207	75	DMP-208	TACCTGAACCGGCACCTG	GGAGGCTG	GCCGTACAGTTCCACAAAGG	isoform alpha only	yes	.	2
	BCL2	BCL2	NM_000657.2	variant beta	DMP-205	6	DMP-206	TTGACAGAGGATCATGCTGTACTT	CAGAGGAA	ATCTTTATTTCATGAGGCACGTT	isoform alpha and beta	yes	.	2
	BCL2A1	A1/BFL1	NM_004049.3	variant 1 (exons 1, 3)	DMP-241	75	DMP-242	CAGGAGAATGGATAAGGCAAA	GGAGGCTG	CCAGCCAGATTTAGGTTCAAA	variant, amplicon (bp): 1, 74; 2, 130	yes	.	3
	BCL2A1	A1/BFL1	NM_001114735.1	variant 2 (exons 1, 2, 3)	DMP-241	75	DMP-242	CAGGAGAATGGATAAGGCAAA	GGAGGCTG	CCAGCCAGATTTAGGTTCAAA	variant, amplicon (bp): 1, 74; 2, 130	yes	.	3
	BCL2A1	A1/BFL1	NM_001114735.1	variant 2 (exons 1, 2, 3)	DMP-381	75	DMP-383	CAGGAGAATGGATAAGGCAAA	GGAGGCTG	ACCAGCATAGGTGTGTGATTGT	variant 2 only (64 bp amplicon (bp))	yes	BCL2A1_v2	7
	BCL2L1	BCL-xL	NM_138578.1	variant 1 (longer)	DMP-243	10	DMP-244	GCTGAGTTACCGGCATCC	CCACCTCC	CTGAAGGGAGAGAAAGAGATTCA	variant, amplicon (bp): 1, 122; 2, 122	yes	BCL2L1 - B	3
	BCL2L1	BCL-xL	NM_138578.1	variant 1 (longer)	DMP-245	36	DMP-246	AGATTGGACGGCCTGATG	CTGGCTCC	AAAGAGCTGGAACAAGTGTGG	.	no	BCL2L1 - A	4
	BCL2L1	BCL-xS	NM_001191.2	variant 2 (shorter)	DMP-243	10	DMP-244	GCTGAGTTACCGGCATCC	CCACCTCC	CTGAAGGGAGAGAAAGAGATTCA	variant, amplicon (bp): 1, 122; 2, 122	yes	BCL2L1 - B	3
	BCL2L1	BCL-xS	NM_001191.2	variant 2 (shorter)	DMP-245	36	DMP-246	AGATTGGACGGCCTGATG	CTGGCTCC	AAAGAGCTGGAACAAGTGTGG	.	no	BCL2L1 - A	4
	BCL2L11	BIM	NM_138621.3	BimEL (variant 1)	DMP-247	70	DMP-248	CATCGCGGTATTCGGTTC	CCGCCGCC	GCTTTGCCATTTGGTCTTTT	variant, amplicon (bp): 1, 132; 6, 132; 9, 132	yes	BCL2L11-B	4
	BCL2L11	BIM	NM_138621.3	BimEL (variant 1)	DMP-249	21	DMP-250	GGCCCCTACCTCCCTACA	CAGAGCCA	GGGGTTTGTGTTGATTTGTCA	variant, amplicon (bp): 1, 258; 6, 78; 9, 78	yes	BCL2L11-C	4
	BCL2L11	BIM	NM_006538.3	BimL (variant 6)	DMP-247	70	DMP-248	CATCGCGGTATTCGGTTC	CCGCCGCC	GCTTTGCCATTTGGTCTTTT	variant, amplicon (bp): 1, 132; 6, 132; 9, 132	yes	BCL2L11-B	4
	BCL2L11	BIM	NM_006538.3	BimL (variant 6)	DMP-249	21	DMP-250	GGCCCCTACCTCCCTACA	CAGAGCCA	GGGGTTTGTGTTGATTTGTCA	variant, amplicon (bp): 1, 258; 6, 78; 9, 78	yes	BCL2L11-C	4
	BCL2L11	BIM	NM_207002.2	BimS (variant 9)	DMP-247	70	DMP-248	CATCGCGGTATTCGGTTC	CCGCCGCC	GCTTTGCCATTTGGTCTTTT	variant, amplicon (bp): 1, 132; 6, 132; 9, 132	yes	BCL2L11-B	4
	BCL2L11	BIM	NM_207002.2	BimS (variant 9)	DMP-249	21	DMP-250	GGCCCCTACCTCCCTACA	CAGAGCCA	GGGGTTTGTGTTGATTTGTCA	variant, amplicon (bp): 1, 258; 6, 78; 9, 78	yes	BCL2L11-C	4
	BCL2L11	BIM	NM_207002.2	BimS (variant 9)	DMP-251	49	DMP-252	CCAGGCCTTCAACCACTATC	GGCCACCA	CCTTGTGGTTGAGTTGTTCTGT	variant, amplicon (bp): 9, 146	yes	BCL2L11-D	4
	BCL2L2	BCL-W	NM_004050.3	.	DMP-231	28	DMP-232	TGGATGGTGGCCTACCTG	GCGGCTGG	CGTCCCCGTATAGAGCTGTG	.	yes	.	3
	BECN1	BECLIN 1	NM_003766.3	.	DMP-229	20	DMP-230	GGATGGTGTCTCTCGCAGAT	CCAGCCAG	TTGGCACTTTCTGTGGACAT	.	yes	.	3
	BID	BID	NM_197966.1	variant 1 (exons 2-7)	DMP-233	69	DMP-234	AGGCCATGGACTGTGAGGT	CTTCCTCC	GCGGAAGCTGTTGTCAGAA	variant, amplicon (bp): 1, 107; 2, 107	yes	BID-A	3
	BID	BID	NM_197966.1	variant 1 (exons 2-7)	DMP-235	44	DMP-236	CAGGAGTGAGTCGGAGCTG	GCTGCCCA	AGGTTTGTGATGCACTCATCC	variant, amplicon (bp): 1, 91; 2, 91;	yes	BID-B	3
	BID	BID	NM_001196.2	variant 2 (exons 1, 3-7)	DMP-233	69	DMP-234	AGGCCATGGACTGTGAGGT	CTTCCTCC	GCGGAAGCTGTTGTCAGAA	variant, amplicon (bp): 1, 107; 2, 107	yes	BID-A	3
	BID	BID	NM_001196.2	variant 2 (exons 1, 3-7)	DMP-235	44	DMP-236	CAGGAGTGAGTCGGAGCTG	GCTGCCCA	AGGTTTGTGATGCACTCATCC	variant, amplicon (bp): 1, 91; 2, 91;	yes	BID-B	3
	BID	BID	NM_197967.1	variant 3 (exons 1, 4-7)	DMP-237	14	DMP-238	GGAGGAAGCGGGTAGTCG	CTGGGAGA	TGAGGCTGGAACCGTTGT	variant, amplicon (bp): 2, 179; 3, 109	yes	BID-C	3
	BIK	BIK	NM_001197.3	.	DMP-223	28	DMP-224	CCCTATGGAGGACTTCGATTC	GCGGCTGG	GGCTCACGTCCATCTCGT	.	yes	.	2
	BLK	BLK	NM_001715.2	.	DMP-225	83	DMP-226	CTGAAGGGGGAGAAGCTACA	GGTGGCTG	TTCCTGTGACGAGTGACCTG	.	yes	.	3
	BMF	BMF	NM_001003940.1	variant 1 (isoform bmf-1)	DMP-373	55	DMP-374	ACCCCAGCGACTCTTTTATG	TCCTCTCC	CAAGACTGCTGGGAAACTGG	variant 1, 2 and 3	yes	.	7
	BMF	BMF	NM_03350.3.3	variant 2 (isoform bmf-1)	DMP-373	55	DMP-374	ACCCCAGCGACTCTTTTATG	TCCTCTCC	CAAGACTGCTGGGAAACTGG	variant 1, 2 and 3	yes	.	7
	BMF	BMF	NM_001003942.1	variant 3 (isoform bmf-2)	DMP-373	55	DMP-374	ACCCCAGCGACTCTTTTATG	TCCTCTCC	CAAGACTGCTGGGAAACTGG	variant 1, 2 and 3	yes	.	7
	BNIP3	BNIP3	NM_004052.2	.	DMP-213	22	DMP-214	TGCTGCTCTCTCATTTGCTG	CTCCACCA	GACTCCAGTTCTTCATCAAAAGGT	.	yes	.	2
	BOK	BOK	NM_032515.3	.	DMP-227	71	DMP-228	GACTGCCTGGGGGAGTTC	CTGGCTGC	CCACACACTTGAGGACATCAG	.	yes	.	3
	GAPDH	GAPDH	NM_002064.3	.	DMP-301	60	DMP-302	AGCCACATCGCTCAGACAC	TGGGGAAG	GCCCAATACGACCAAATCC	.	yes	.	1
	GATA6	GATA6	NM_005257.3	.	DMP-285	90	DMP-286	AATACTTCCCCCACAACACAA	TGAGGCTG	CTCTCCCGCACCAGTCAT	.	yes	.	5
	GUSB	GUSB	NM_000181.2	.	DMP-303	57	DMP-304	CGCCCTGCCTATCTGTATTC	CTGGGGCC	TCCCCACAGGGAGTGTGTAG	.	yes	.	1
	HRK	HRK	NM_003806.1	.	DMP-215	71	DMP-216	TACTGGCCTTGGCTGTGC	CTGGCTGC	CACAGGGTTTTCACCAACCT	.	yes	.	2
	MAP2	MAP2	NM_001039538.1	variant 5 (isoform 5)	DMP-273	36	DMP-274	CAGCAGGTGGGGAATCAG	CTGGCTCC	GCAGGAATCTTTGACAAGGTAGA	variant 5 only	yes	.	5
	MCL1	MCL1	NM_021960.3	variant 1 (Mcl-1L)	DMP-211	4	DMP-212	AAGCCAATGGGCAGGTCT	GCAGGAAG	TGTCCAGTTTCCGAAGCAT	variant 1 only (Mcl-1l)	yes	.	2
	MDM2	MDM2	NM_002392.3	.	DMP-379	37	DMP-380	TCCCCGGATTAGTGCGTA	TGCCCTGG	CGGGGATCATTCCACTCTC	.	no	.	7
	NANOG	NANOG	NM_024865.2	.	DMP-269	69	DMP-270	ATGCCTCACACGGAGACTGT	CTTCCTCC	AGGGCTGTCCTGAATAAGCA	.	yes	.	5
	OAZ1	OAZ1	NM_004152.2	.	DMP-309	74	DMP-310	CACCATGCCGCTCCTAAG	GGCAGCAG	GAGGGAGACCCTGGAACTCT	.	yes	.	1
	PGK1	PGK1	NM_000291.3	.	DMP-311	72	DMP-312	TGCAAAGGCCTTGGAGAG	GCCAGGAA	TGGATCTTGTCTGCAACTTTAGC	.	yes	.	1
	PMAIP1	NOXA	NM_021127.2	.	DMP-219	67	DMP-220	GGAGATGCCTGGGAAGAAG	CTCCAGCA	CCTGAGTTGAGTAGCACACTCG	.	yes	Mislabeled as BCL210-A on plate	2
	POU5F1	OCT4	NM_203289.4	variant 2 (isoform 2)	DMP-265	29	DMP-266	GGGGAGATTGATAACTGGTGTG	CTTCTGCC	CTTTGATGTCCTGGGACTGG	variant 2	yes	.	5	FAIL
	PPIA	PPIA	NM_021130.3	.	DMP-313	48	DMP-314	ATGCTGGACCCAACACAAAT	TTCCCAGT	TCTTTCACTTTGCCAAACACC	.	yes	.	1
	RPL13A	RPL13A	NM_012423.2	.	DMP-315	74	DMP-316	CTGGACCGTCTCAAGGTGTT	GGCAGCAG	GCCCCAGATAGGCAAACTT	.	yes	.	1
	SDHA	SDHA	NM_004168.2	.	DMP-317	80	DMP-318	GGACCTGGTTGTCTTTGGTC	CCTGGAGA	CCAGCGTTTGGTTTAATTGG	.	yes	.	1
	SOX2	SOX2	NM_003106.2	.	DMP-267	19	DMP-268	ATGGGTTCGGTGGTCAAGT	CTCCAGCC	GGAGGAAGAGGTAACCACAGG	.	yes	.	5
	SRP14	SRP14	NM_003134.4	.	DMP-319	38	DMP-320	AGGTTATTAGAATTGAAACCTGACAGT	GGAAGCAG	TGGGGAACCATGATGATAAAA	.	no	.	1
	T	T	NM_003181.2	.	DMP-287	23	DMP-288	AGGTACCCAACCCTGAGGA	CCAGCCC	GCAGGTGAGTTGTCAGAATAGGT	.	yes	.	5
	TBP	TBP	NM_003194.3	.	DMP-321	3	DMP-322	GCTGGCCCATAGTGATCTTT	CCCAGCAG	TCCTTGGGTTATCTTCACACG	.	yes	.	5
	THAP11	THAP11	NM_020457.2	.	DMP-327	79	DMP-328	GCCTCTGCCTCCTAGGACTT	CCTCCTGG	GGTCATCCAGATCCCCTTG	.	no	.	5
	TP53	P53	NM_000546.4	variant 1 (isoform a)	DMP-369	12	DMP-370	AGGCCTTGGAACTCAAGGAT	GGAAGGAG	CCCTTTTTGGACTTCAGGTG	variants 1 - 7	yes	.	7
	TP53	P53	NM_001126112.1	variant 2 (isoform a)	DMP-369	12	DMP-370	AGGCCTTGGAACTCAAGGAT	GGAAGGAG	CCCTTTTTGGACTTCAGGTG	variants 1 - 7	yes	.	7
	TP53	P53	NM_001126114.1	variant 3 (isoform b)	DMP-369	12	DMP-370	AGGCCTTGGAACTCAAGGAT	GGAAGGAG	CCCTTTTTGGACTTCAGGTG	variants 1 - 7	yes	.	7
	TP53	P53	NM_001126113.1	variant 4 (isoform c)	DMP-369	12	DMP-370	AGGCCTTGGAACTCAAGGAT	GGAAGGAG	CCCTTTTTGGACTTCAGGTG	variants 1 - 7	yes	.	7
	TP53	P53	NM_001126115.1	variant 5 (isoform d)	DMP-369	12	DMP-370	AGGCCTTGGAACTCAAGGAT	GGAAGGAG	CCCTTTTTGGACTTCAGGTG	variants 1 - 7	yes	.	7
	TP53	P53	NM_001126116.1	variant 6 (isoform e)	DMP-369	12	DMP-370	AGGCCTTGGAACTCAAGGAT	GGAAGGAG	CCCTTTTTGGACTTCAGGTG	variants 1 - 7	yes	.	7
	TP53	P53	NM_001126117.1	variant 7 (isoform f)	DMP-369	12	DMP-370	AGGCCTTGGAACTCAAGGAT	GGAAGGAG	CCCTTTTTGGACTTCAGGTG	variants 1 - 7	yes	.	7
	TUBB3	TUBB3	NM_006086.2	.	DMP-271	78	DMP-273	GCAACTACGTGGGCGACT	AGCTGGAG	CGAGGCACGTACTTGTGAGA	.	yes	.	5
	UBC	UBC	NM_021009.4	.	DMP-323	11	DMP-324	GGCAAAGATCCAAGATAAGGAA	CTTCCAGC	GGACCAAGTGCAGAGTGGAC	.	no	.	1
	YWHAZ	YWHAZ	NM_003406.3	variant 1 (isoform 1)	DMP-325	30	DMP-326	GATCCCCAATGCTTCACAAG	GGCTGAGG	TGCTTGTTGTGACTGATCGAC	variant 1, 2, 3, 4, 5 and 6 (same amplicon (bp))	yes	.	1
	YWHAZ	YWHAZ	NM_145690.2	variant 2 (isoform 1)	DMP-325	30	DMP-326	GATCCCCAATGCTTCACAAG	GGCTGAGG	TGCTTGTTGTGACTGATCGAC	variant 1, 2, 3, 4, 5 and 6 (same amplicon (bp))	yes	.	1
	YWHAZ	YWHAZ	NM_001135699.1	variant 3 (isoform 1)	DMP-325	30	DMP-326	GATCCCCAATGCTTCACAAG	GGCTGAGG	TGCTTGTTGTGACTGATCGAC	variant 1, 2, 3, 4, 5 and 6 (same amplicon (bp))	yes	.	1
	YWHAZ	YWHAZ	NM_001135700.1	variant 4 (isoform 1)	DMP-325	30	DMP-326	GATCCCCAATGCTTCACAAG	GGCTGAGG	TGCTTGTTGTGACTGATCGAC	variant 1, 2, 3, 4, 5 and 6 (same amplicon (bp))	yes	.	1
	YWHAZ	YWHAZ	NM_001135701.1	variant 5 (isoform 1)	DMP-325	30	DMP-326	GATCCCCAATGCTTCACAAG	GGCTGAGG	TGCTTGTTGTGACTGATCGAC	variant 1, 2, 3, 4, 5 and 6 (same amplicon (bp))	yes	.	1
	YWHAZ	YWHAZ	NM_001135702.1	variant 6 (isoform 1)	DMP-325	30	DMP-326	GATCCCCAATGCTTCACAAG	GGCTGAGG	TGCTTGTTGTGACTGATCGAC	variant 1, 2, 3, 4, 5 and 6 (same amplicon (bp))	yes	.	1

## Sheet: UPL Probe Sequences
	UPL	Sense	Antisense
	1
	2	CAGGAGAA	TTCTCCTG
	3	CCCAGCAG	CTGCTGGG
	4	GCAGGAAG	CTTCCTGC
	5	CAGCCACA	TGTGGCTG
	6	CAGAGGAA	TTCCTCTG
	7	GGGAGAAG	CTTCTCCC
	8	GAAGGCAG	CTGCCTTC
	9	TGGTGATG	CATCACCA
	10	CCACCTCC	GGAGGTGG
	11	CTTCCAGC	GCTGGAAG
	12	GGAAGGAG	CTCCTTCC
	13	CTCTGCCT	AGGCAGAG
	14	CTGGGAGA	TCTCCCAG
	15	TCCTGCTC	GAGCAGGA
	16	CTGCCTCC	GGAGGCAG
	17	AGGAGCTC	GAGCTCCT
	18	CAGCAGGA	TCCTGCTG
	19	CTCCAGCC	GGCTGGAG
	20	CCAGCCAG	CTGGCTGG
	21	CAGAGCCA	TGGCTCTG
	22	CTCCACCA	TGGTGGAG
	23	CCAGCCC	GGGCTGG
	24
	25	CTCCTCCA	TGGAGGAG
	26	CAGCCCAG	CTGGGCTG
	27
	28	GCGGCTGG	CCAGCCGC
	29	CTTCTGCC	GGCAGAAG
	30	GGCTGAGG	CCTCAGCC
	31	TTCCACCA	TGGTGGAA
	32	GGGAGCAG	CTGCTCCC
	33	AGCTGGGA	TCCCAGCT
	34	CTGCCTCT	AGAGGCAG
	35	AGAAGAGGA	TCCTCTTCT
	36	CTGGCTCC	GGAGCCAG
	37	TGCCCTGG	CCAGGGCA
	38	GGAAGCAG	CTGCTTCC
	39	CTCCACCT	AGGTGGAG
	40
	41	GGCTGAAG	CTTCAGCC
	42	CATCCAGC	GCTGGATG
	43
	44	GCTGCCCA	TGGGCAGC
	45	CTGGGGCT	AGCCCCAG
	46
	47	ACACTGGA	TCCAGTGT
	48	TTCCCAGT	ACTGGGAA
	49	GGCCACCA	TGGTGGCC
	50	GCTCCAGA	TCTGGAGC
	51	GGCAGGAG	CTCCTGCC
	55	TCCTCTCC	GGAGAGGA
	56	TGCTGTCC	GGACAGCA
	57	CTGGGGCC	GGCCCCAG
	58	CTCCATCC	GGATGGAG
	59	TGCCACTG	CAGTGGCA
	60	TGGGGAAG	CTTCCCCA
	61	CTGGGCAA	TTGCCCAG
	62	CAGCAGGT	ACCTGCTG
	63	AGGAGGAG	CTCCTCCT
	64	CAGCCTGG	CAGCCTGG
	65	TCCTCCAG	CTGGAGGA
	66	CAGCAGCC	GGCTGCTG
	67	CTCCAGCA	TGCTGGAG
	68	AGGAGCAG	CTGCTCCT
	69	CTTCCTCC	GGAGGAAG
	70	CCGCCGCC	GGCGGCGG
	71	CTGGCTGC	GCAGCCAG
	72	GCCAGGAA	TTCCTGGC
	73	TCCTCAGC	GCTGAGGA
	74	GGCAGCAG	CTGCTGCC
	75	GGAGGCTG	CAGCCTCC
	78	AGCTGGAG	CTCCAGCT
	79	CCTCCTGG	CCAGGAGG
	80	CCTGGAGA	TCTCCAGG
	81	CCAGGGCC	GGCCCTGG
	82	CAGAGGAG	CTCCTCTG
	83	GGTGGCTG	CAGCCACC
	84	GCAGCAGA	TCTGCTGC
	85	GACCTGGA	TCCAGGTC
	86	TCCACTGC	GCAGTGGA
	87	GGTGGCAG	CTGCCACC
	88	GGAGGATG	CATCCTCC
	89	CAGCATCC	GGATGCTG
	90	TGAGGCTG	CAGCCTCA
